# Supplementary material
Source: PubMed Central journal article supplement (PMC10091837)
Supplement: NIHMS1877696-supplement-eTable_1.pdf [file NIHMS1877696-supplement-eTable_1.pdf]

eTable 1. Respiratory Viral Panel for Viral Genome Sequencing

| <b>Virus family</b> | <b>Virus genus</b> | <b>Virus species</b>        | <b>Types and subtypes</b>            | <b>Additional names</b> | <b>Genome type</b> |
|---------------------|--------------------|-----------------------------|--------------------------------------|-------------------------|--------------------|
| Adenoviridae        | Mastadenovirus     | Human adenovirus B          | 3, 7, 11, 14, 16, 21, 34, 35, 50, 55 |                         | dsDNA              |
| Adenoviridae        | Mastadenovirus     | Human adenovirus C          | 1, 2, 5, 6, 5                        |                         | dsDNA              |
| Adenoviridae        | Mastadenovirus     | Human adenovirus E          | 4                                    |                         | dsDNA              |
| Coronaviridae       | Alpha-coronavirus  | Human coronavirus 229E      |                                      |                         | (+)ssRNA           |
| Coronaviridae       | Beta-coronavirus   | Human coronavirus HKU1      |                                      |                         | (+)ssRNA           |
| Coronaviridae       | Alpha-coronavirus  | Human coronavirus NL63      |                                      |                         | (+)ssRNA           |
| Coronaviridae       | Beta-coronavirus   | Human coronavirus OC43      |                                      |                         | (+)ssRNA           |
| Orthomyxoviridae    | Influenza virus A  | Influenza A virus           | H1N1, H2N2, H3N2, H5N1, H7N9         |                         | (-)ssRNA           |
| Orthomyxoviridae    | Influenza virus B  | Influenza B virus           | Victoria, Yamagata lineages          |                         | (-)ssRNA           |
| Paramyxoviridae     | Respirovirus       | Human parainfluenza virus 1 |                                      |                         | (-)ssRNA           |
| Paramyxoviridae     | Rubulavirus        | Human parainfluenza virus 2 |                                      |                         | (-)ssRNA           |
| Paramyxoviridae     | Respirovirus       | Human parainfluenza virus 3 |                                      |                         | (-)ssRNA           |
| Paramyxoviridae     | Rubulavirus        | Human parainfluenza virus 4 | 4a, 4b                               |                         | (-)ssRNA           |
| Parvoviridae        | Bocaparvovirus     | Primate bocaparvovirus 1    | 1, 3                                 | Human bocavirus         | ssDNA              |
| Parvoviridae        | Bocaparvovirus     | Primate bocaparvovirus 2    | 2, 4                                 | Human bocavirus         | ssDNA              |
| Picornaviridae      | Enterovirus        | Human enterovirus C         | 104, 109                             |                         | (+)ssRNA           |
| Picornaviridae      | Enterovirus        | Human rhinovirus A          | >100 serotypes                       |                         | (+)ssRNA           |
| Picornaviridae      | Enterovirus        | Human rhinovirus B          | >25 serotypes                        |                         | (+)ssRNA           |
| Picornaviridae      | Enterovirus        | Human rhinovirus C          | >50 serotypes                        |                         | (+)ssRNA           |
| Picornaviridae      | Parechovirus       | Parechovirus A              | 1, 6 (E22, E23)                      | Human parechovirus      | (+)ssRNA           |

| <b>Virus family</b> | <b>Virus genus</b> | <b>Virus species</b>              | <b>Types and subtypes</b> | <b>Additional names</b> | <b>Genome type</b> |
|---------------------|--------------------|-----------------------------------|---------------------------|-------------------------|--------------------|
| Pneumoviridae       | Metapneumovirus    | Human metapneumovirus             | A, B                      |                         | (-)ssRNA           |
| Pneumoviridae       | Orthopneumovirus   | Human respiratory syncytial virus | A, B                      |                         | (-)ssRNA           |
| Polyomaviridae      | Betapolyomavirus   | Human polyomavirus 3              |                           | KI polyomavirus         | dsDNA              |
| Polyomaviridae      | Betapolyomavirus   | Human polyomavirus 4              |                           | WU polyomavirus         | dsDNA              |

Abbreviations: dsDNA, double-stranded DNA; ssRNA, single-stranded RNA.
